# Supplementary material for: Guanine inhibits the growth of human glioma and melanoma cell lines by interacting with GPR23
Source: Front Pharmacol. 2022 Sep 19;13:970891. doi: 10.3389/fphar.2022.970891 (PMC9527276; doi:10.3389/fphar.2022.970891)
Supplement: Supplementary file 2 [file DataSheet3.xlsx]

## Sheet: data
List of orphan GPCRs (including de-orphanized LPAR4 and LPAR6) with significant similarity to adenosine receptors or P2RY1 and expression data of TCGA glioblastoma and nornal brain tissue: RNAseq data in Transcript per million (TPM)
Gene.name_GRGh38	NCBI.gene.ID	Gene.description_GRGh38	Averaged TPM_TCGA_glioblastoma	Standard Deviation	Averaged TPM_Normal brain tissue (TGCA)	Standard Deviation
LPAR4/GPR23	2846	lysophosphatidic acid receptor 4 [Source:HGNC Symbol;Acc:HGNC:4478]	3.40816	4.03388	1.70374	0.646484
GPR161	23432	G protein-coupled receptor 161 [Source:HGNC Symbol;Acc:HGNC:23694]	8.97497	4.96772	3.35167	0.993003
GPR101	83550	G protein-coupled receptor 101 [Source:HGNC Symbol;Acc:HGNC:14963]	0.0494337	0.101887	0.862699	0.917977
GPR52	9293	G protein-coupled receptor 52 [Source:HGNC Symbol;Acc:HGNC:4508]	0.0974808	0.201093	3.67061	1.59109
GPR21	0	G protein-coupled receptor 21 [Source:HGNC Symbol;Acc:HGNC:4476]	0.0444431	0.0606182	0.281842	0.143174
GPR45	11250	G protein-coupled receptor 45 [Source:HGNC Symbol;Acc:HGNC:4503]	1.38963	1.61252	3.19924	1.60018
GPR12	2835	G protein-coupled receptor 12 [Source:HGNC Symbol;Acc:HGNC:4466]	2.92747	3.86048	13.3235	5.0641
GPR61	83873	G protein-coupled receptor 61 [Source:HGNC Symbol;Acc:HGNC:13300]	0.549373	0.55057	8.47177	3.08483
GPR35	2859	G protein-coupled receptor 35 [Source:HGNC Symbol;Acc:HGNC:4492]	2.40618	1.34882	1.539	0.807324
GPR162	27239	G protein-coupled receptor 162 [Source:HGNC Symbol;Acc:HGNC:16693]	55.5517	32.801	152.909	56.3276
GPR19	2842	G protein-coupled receptor 19 [Source:HGNC Symbol;Acc:HGNC:4473]	11.1271	6.52408	7.61337	1.61887
GPR83	10888	G protein-coupled receptor 83 [Source:HGNC Symbol;Acc:HGNC:4523]	0.821599	1.5404	20.1887	10.8728
GPR22	2845	G protein-coupled receptor 22 [Source:HGNC Symbol;Acc:HGNC:4477]	0.969259	2.05364	19.2973	7.04366
GPR63	81491	G protein-coupled receptor 63 [Source:HGNC Symbol;Acc:HGNC:13302]	1.21954	1.1283	3.9537	1.83122
GPR3	2827	G protein-coupled receptor 3 [Source:HGNC Symbol;Acc:HGNC:4484]	11.0397	6.62725	9.55911	8.52464
GPR176	11245	G protein-coupled receptor 176 [Source:HGNC Symbol;Acc:HGNC:32370]	13.8784	7.51798	32.5395	15.7299
GPR6	2830	G protein-coupled receptor 6 [Source:HGNC Symbol;Acc:HGNC:4515]	0.227607	0.634215	8.50052	6.11221
GPR39	2863	G protein-coupled receptor 39 [Source:HGNC Symbol;Acc:HGNC:4496]	1.77649	2.89647	0.398182	0.149226
GPR17	2840	G protein-coupled receptor 17 [Source:HGNC Symbol;Acc:HGNC:4471]	57.7005	117.648	67.8703	22.6703
LPAR6/P2RY5	10161	lysophosphatidic acid receptor 6 [Source:HGNC Symbol;Acc:HGNC:15520]	27.0358	12.6074	8.51853	1.20271
GPR183	1880	G protein-coupled receptor 183 [Source:HGNC Symbol;Acc:HGNC:3128]	25.8548	24.4571	9.24696	3.9894
GPR4	2828	G protein-coupled receptor 4 [Source:HGNC Symbol;Acc:HGNC:4497]	13.2108	6.65563	4.43928	3.82699
GPR34	2857	G protein-coupled receptor 34 [Source:HGNC Symbol;Acc:HGNC:4490]	79.7745	54.1041	20.6875	9.91352
GPR171	29909	G protein-coupled receptor 171 [Source:HGNC Symbol;Acc:HGNC:30057]	0.555871	0.554926	0.160136	0.0438909
LPAR5	57121	lysophosphatidic acid receptor 5 [Source:HGNC Symbol;Acc:HGNC:13307]	21.8615	13.7025	10.9845	1.42773
GPR87	53836	G protein-coupled receptor 87 [Source:HGNC Symbol;Acc:HGNC:4538]	0.0917832	0.146044	0.18187	0.225077
GPR68	8111	G protein-coupled receptor 68 [Source:HGNC Symbol;Acc:HGNC:4519]	1.51856	1.71218	14.4222	10.7872
GPR132	29933	G protein-coupled receptor 132 [Source:HGNC Symbol;Acc:HGNC:17482]	2.83084	1.78925	1.66176	0.300184
GPR25	2848	G protein-coupled receptor 25 [Source:HGNC Symbol;Acc:HGNC:4480]	0.0771806	0.107597	0.13952	0.0465607
GPR15	2838	G protein-coupled receptor 15 [Source:HGNC Symbol;Acc:HGNC:4469]	0.0980572	0.294915	0.103788	0.0818227
GPR182	11318	G protein-coupled receptor 182 [Source:HGNC Symbol;Acc:HGNC:13708]	0.051684	0.0509213	0.117666	0.0919569
GPR63	81491	G protein-coupled receptor 63 [Source:HGNC Symbol;Acc:HGNC:13302]	1.21954	1.1283	3.9537	1.83122
P2RY8	286530	P2Y receptor family member 8 [Source:HGNC Symbol;Acc:HGNC:15524]	2.11199	2.01101	0.304782	0.0968236
